# Supplementary material for: Transient nature of graphene quantum dot formation via a hydrothermal reaction
Source: Royal Society of Chemistry journal article supplement (doi:10.1039/c4ra09159k), 2014-01-01
Supplement: c4ra09159k1.pdf [file c4ra09159k1.pdf]

## Supporting Information

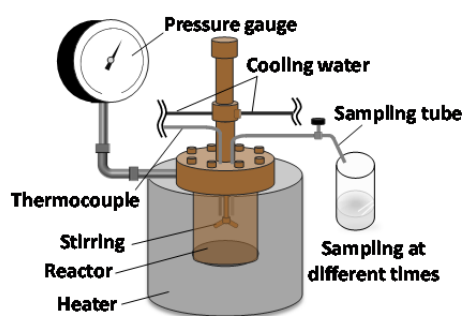

Figure SI-1. Developed experimental apparatus for hydrothermal reaction system

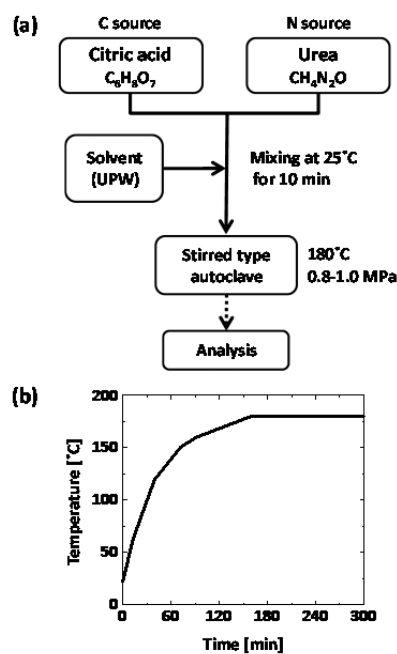

Figure SI-2 (a) Experimental method and (b) Solution temperature in the stirred type autoclave reactor as a function of reaction time.

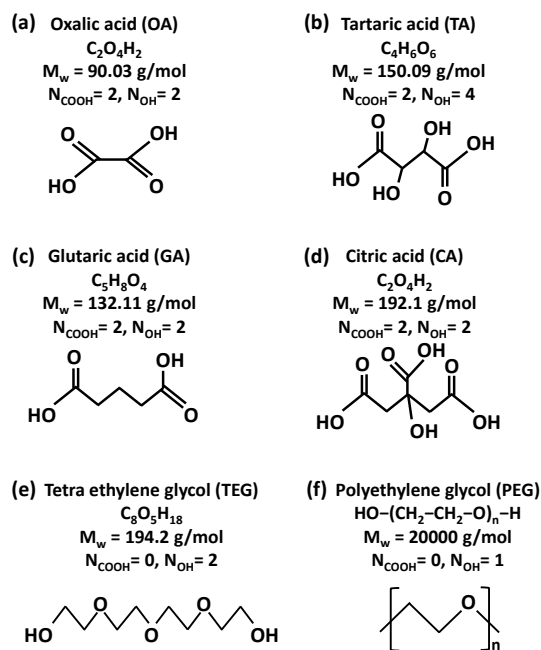

**Figure SI-3** Various carbon sources used in the experiment; (a) Oxalic acid (OA), (b) Tartaric acid (TA), (c) Glutaric acid (GA), (d) Citric acid (CA), (e) Tetra ethylene Glycol (TEG), (f) Polyethylene Glycol (PEG);  $M_w$ ,  $N_{COOH}$ , and  $N_{OH}$  indicate molecular weight, number of COOH function, and number of OH function, respectively.
